# Supplementary material for: Time series of alpine snow surface radiative temperature maps from high precision thermal infrared imaging
Source: Copernicus journal article supplement (doi:10.5194/essd-2024-55), 2024-02-26
Supplement: Supplementary file [file essd-2024-55-RC2-supplement.pdf]

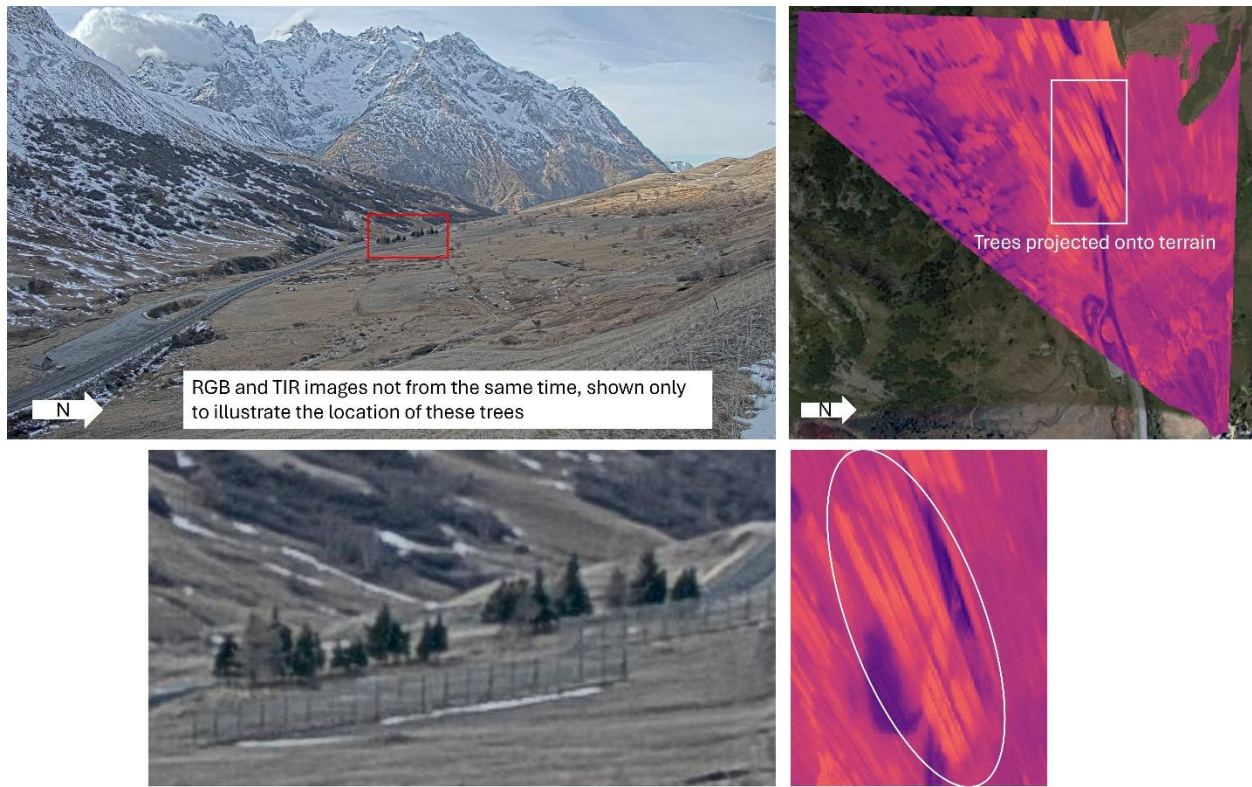

**Figure 1.** RGB image on left showing the location of this stand of trees. TIR image on right showing the result of projecting the image onto a bare-ground DEM where the trees are then draped over the terrain behind them, causing a large area to appear the same temperature as the sides of these trees.

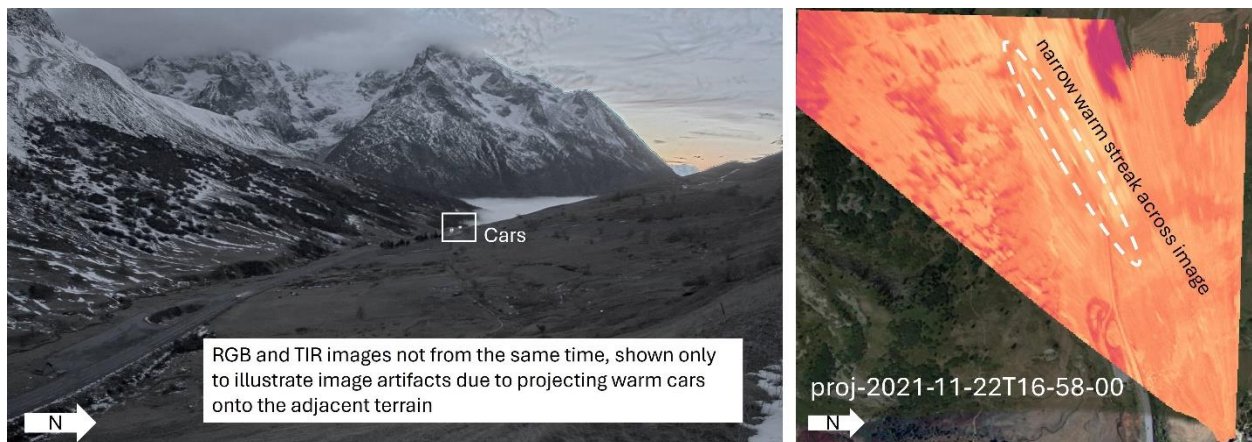

**Figure 2.** At the same location as the stand of trees in Figure 1, when a car is captured in an image passing by this spot its warm signature is also draped across the terrain behind the car. This causes narrow warm streaks in some images. (Cars are visible elsewhere on the road in other images where this effect is minimal due to a different view angle)
